# Supplementary material for: Significant Interfacial Dielectric Relaxation of Covalently Bonded Ice-Hydrogels
Source: MDPI journal article supplement (doi:10.3390/gels8070409), 2022-06-28
Supplement: s1 [file s1]

## Article

# Significant Interfacial Dielectric Relaxation of Covalently Bonded Ice-Hydrogels

Yongqiang Li <sup>1,\*</sup>, Liufang Chen <sup>1</sup>, Chuanfu Li <sup>1</sup>, Lin Lin <sup>2</sup>, Zhibo Yan <sup>1,\*</sup> and Junming Liu <sup>1</sup>

<sup>1</sup> Laboratory of Solid State Microstructures, Nanjing University, Nanjing 210093, China; lfchen502@163.com (L.C.); lichuanfu\_com@126.com (C.L.); liujm@nju.edu.cn (J.L.)

<sup>2</sup> Department of Applied Physics, College of Science, Nanjing Forestry University, Nanjing 210037, China; llin@njfu.edu.cn

\* Correspondence: yongqgl@126.com (Y.L.); zbyan@nju.edu.cn (Z.Y.)

## Supplementary Materials

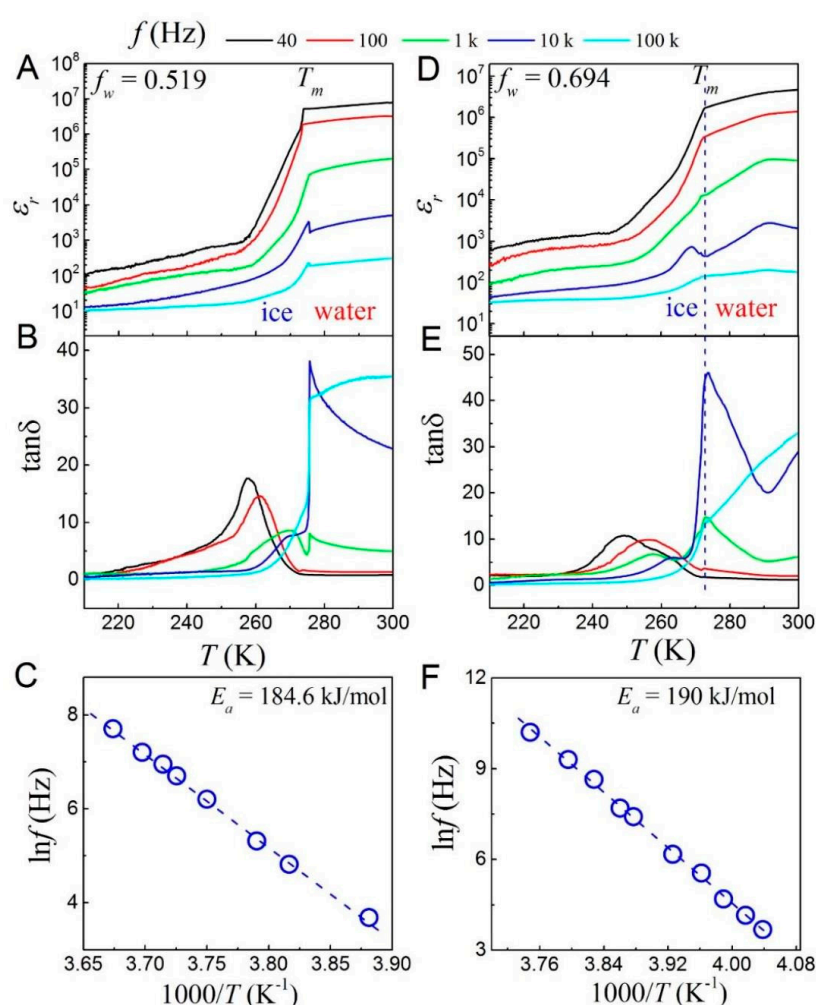

**Figure S1.** (A) and (D) measured dielectric constant  $\epsilon_r$  as a function of temperature  $T$ ; (B) and (E) measured loss  $\tan \delta$  as a function of temperature  $T$  function, they are all measured data from the heating program at several frequencies starting at 200 K. (C) and (F) evaluated  $T_{max}$  versus  $f$ , from which the activation energy  $E_a$  was calculated by the Arrhenius equation. Figures (A), (B) and (C) are hydrogels with  $f_w = 0.519$ ; Figures (D), (E) and (F) are hydrogels with  $f_w = 0.694$ .
